# Supplementary material
Source: publisher site journal article supplement (https://www.dovepress.com/article/534937)
Supplement: Supplementary file 1 [file 534937%20Revised%20supplementary.docx]

**Supplemental Table 1.** Group isokinetic testing, hop testing, RTS criteria and % RTS findings. Q = quadriceps, H = hamstrings, LE = lower extremity, NR = not reported, BW = bodyweight, LSI = limb symmetry index, NR = not reported, STG = semitendinosus – gracilis, BPTB = bone patellar tendon bone, auto = autograft, SLH = single leg hop.

| **Group** | **Study** | **Isokinetic Testing** | **Hop Testing** | **RTS Criteria Reported** | **% of patients that RTS** |
| --- | --- | --- | --- | --- | --- |
| 1 | Andrews et al.18 | NR | NR | RTS delayed until Q/H strength was 85% of BW. No pain or swelling after activity | 7/8 (87.5%) RTS |
| 1 | Aronowitz et al.19 | NR | NR | RTS delayed until Q strength was 90% that of contralateral side | 16/19 (84%) returned to the same sport; Remaining 3 chose to return to less strenuous sports |
| 1 | Calvo et al.21 | NR | NR | RTS delayed until strength deficit was < 10% of contralateral limb | 24/27 (88.9%) returned to same or higher level, while 3/27 (11.1%) returned to lower sport level |
| 1 | Cassard et al.22 | NR | NR | NR | 28/28 (100%) returned to previous or higher sport levels |
| 1 | Cohen et al.23 | NR | NR | NR | 23/25 (92%) returned to the same or higher sports level. |
| 1 | Cordasco et al.69 | isokinetic strength testing (performed starting at 5 months  and at clearance) | SLH test (performed  starting at 5 months). | Cleared for RTS based on quantitative measures using the LSI and qualitative measures as well as the ability to meet the demands of their sport | 83/83 (100%) RTS with 93% reporting returning to the previous sports performance level. |
| 1 | Cordasco et al.70 | NR | NR | Rehabilitation was based on quantitative and qualitative risk benchmarks that needed to be achieved before RTS | 301/324 (93%) RTS rate; Higher in group 1 (100%, all epiphyseal, STG auto) and group 3 (94%, transphyseal, BPTB auto) than in group 2 (85%, partial transphyseal, STG auto) |
| 1 | Demange et al. 25 | NR | NR | NR | 10/12 (83.3%) returned to competitive or recreational sports. |
| 1 | Ellis et al.27 | NR | Athletes performed 21 physical tasks with success at >18 = passing | NR | NR |
| 1 | Falciglia et al.29 | NR | NR | RTS allowed 6 months post-surgery when muscular conditioning was restored; Return to contact sports permitted when full ROM and strength achieved, with no growth disturbance | NR |
| 1 | Fuchs et al.32 | NR | NR | NR | 9/10 (90%) patients returned to their pre-injury activity level |
| 1 | Goddard et al.35 | NR | 90% LSI achieved in 90% of patients with SLH test. | NR | 29/29 (100%) reported no activity restrictions |
| 1 | Grassi et al.36 | NR | NR | NR | 47/52 (90%) RTS after ACLR; 15% reduced activity level; at 10 yrs., 61% still active, 35% at same pre-injury level |
| 1 | Guzzanti et al. 37 | NR | NR | NR | 5/5 (100%) returned to vigorous sports |
| 1 | Henry et al.38 | NR | NR | NR | 43/56 (76.8%) RTS at same or higher level |
| 1 | Hui et al.39 | NR | 81% had > 90% of contralateral limb distance with SLH test | NR | 16/16 (100%) returned to strenuous activity by 2 yrs |
| 1 | Kew et al.40 | 90°/s, Q/H peak torque, calculated LSI | SLH for distance, triple hop, crossover hop, timed 6m hop were performed (no significant difference in hop tests between reinjury vs no reinjury) | NR | 100/100 (100%) RTS |
| 1 | Kilkenny et al.41 | Lower extremity strength and power assessed using isokinetic dynamometer | Force plate testing and 2D/3D biomechanical analysis used during rehabilitation | Functional assessment: gait, ROM, closed-chain strengthening, plyometrics, biomechanical analyses | 339/358 (94.7%) RTS |
| 1 | Kocher et al. 44 | NR | NR | Full activity allowed at 6 months after surgery if patients completed rehabilitation | 59/59 (100%) RTS |
| 1 | Kocher et al.43 | NR | NR | NR | 229/237 (96.6%) RTS |
| 1 | Lanzetti et al.45 | NR | NR | RTS clearance **based on surgeon’s judgement of muscle recovery and rehabilitation progress** | 22/42 (52.4%) RTS |
| 1 | Lo et al.46 | NR | NR | NR | 4/5 (80%) RTS |
| 1 | Mansson et al.76 | > 90% equivalence with knee extension/ flexion at 60°/s and 180°/sec | SLH test was 84%; square hop test was 97.1% | NR | 100% (29/29) unchanged activity level |
| 1 | McCarroll et al.48 | NR | NR | RTS was both time and rehabilitation recovery-based | 55/60 (91.7%) RTS at same level |
| 1 | McIntosh et al. 49 | NR | NR | NR | 14/16 (87.5%) returned to same activity level |
| 1 | Micheli et al. 50 | NR | NR | NR | 8/8 (100%) RTS at 9-15 months |
| 1 | Morgan et al.77 | NR | NR | NR | 69% (168/242) RTS at 15 year FU |
| 1 | Moussa et al.78 | NR | NR | Demonstrate quadriceps control and mastery of the screw home mechanism | 74.6% (n = 85/114) of ACLR alone and 75.4% (n = 89/118) or ACLR + LEAP. RTS rates with similar sports levels between groups |
| 1 | Parker et al.54 | 60°/s and 240°/s for Q/H strength | Functional hop test battery | NR | 4/5 (80%) returned to previous sports competition level |
| 1 | Pennock et al.55 | NR | NR | RTS clearance based on formal tests (at 6-12 m postop) | NR |
| 1 | Redler et al.56 | NR | NR | Custom brace during pivoting sports. Criteria including rehabilitation milestones, stability, no symptoms | 18/18 (100%) RTS at previous level |
| 1 | Robert et al.57 | NR | NR | Clearance based on knee stability, range of motion, and rehabilitation progress | 8/8 (100%) RTS at preinjury level |
| 1 | Seon et al.59 | NR | NR | NR | 10/11 (90.9%) RTS |
| 1 | Shelbourne et al.60 | isokinetic test with goal of 98% equivalence to contralateral side | NR | Clearance based on strength, full range of motion, negative anterior Lachman test, and stable KT-1000 results | 16/16 (100%) RTS |
| 1 | Shelbourne et al.61 | NR | NR | Quad strength > 85% of contralateral limb before RTS | 356/402 (88.6%) RTS |
| 1 | Streich et al.63 | NR | NR | Operative group allowed to RTS (pivoting) after 12m with brace. Higher activity scores for surgical than nonsurgical group | 16/16 (100%) of the surgical group RTS. |
| 1 | Thorolfsson et al.79 | NR | NR | NR | 946/1392 (68%) RTS |
| 1 | Webster et al.66 | NR | NR | NR | 335/561 (59.7%) RTS; 97/110 (88.2%) for < 20 years; 238/451 (52.8%) for ≥ 20 years |
| 1 | Webster et al.67 | NR | NR | NR | NR |
| 2 | Engebretsen et al.28 | 60°/s (Q/H peak torque, Q/H ratio vs contralateral knee) | NR | NR | NR |
| 2 | Bigoni et al.20 | NR | Mean LSI 94.8% (range = 86.5-102%) with SLH test | NR | 5/5 (100%) returned to pre-injury activity level |
| 2 | Dabis et al.24 | NR | NR | Clearance based on clinical exam, rehabilitation progression, and stability. | 20/20 (100%) RTS by 2 years |
| 2 | Fleming et al.31 | Peak knee extensor/flexor torque at 60°/s | SLH, triple hop, 6m timed hop, crossover hop were performed. | NR |  |
| 2 | Gagliardi et al.33 | NR | NR | NR | 14/18 (77.8%) SLA group and 141/144 (97.9%) RTS. No statistical difference |
| 2 | Gaulrapp et al.34 | NR | NR | NR | NR |
| 2 | Al Kindi et al.42 | NR | NR | NR | NR |
| 2 | Murray et al.52 | Peak flexor torque 60°/s at 6, 12, 24 months. No significant difference between ACLR and ACL repair groups | SLH, triple hop, 6m timed hop, crossover hop performed at 6, 12, 24 months. Results similar between groups. Both groups 90-95% of contralateral side by 24 months | NR | NR |
| 2 | Murray et al.53 | H, Q and hip abductor muscle isometric strengths measured with a handheld dynamometer | SLH, triple hop, 6-m timed hop, and crossover hop | NR | NR |
| 2 | Sanborn et al.58 | Strength assessed by hand-held dynamometer  H (injured limb % contralateral): **BEAR 93.1 ± 3.0% vs ACLR 58.9 ± 3.6% (p<.001)** | SLH, triple hop, 6m timed hop, crossover hop. LSI roughly 95% for both groups | Patients cleared for RTS based on subjective knee stability, stable ligament exam and return of near full muscle strength on standardized functional testing | Patients with higher ACL-RSI scores at 6 months were cleared earlier for RTS |
| 2 | Steadman et al.62 | NR | NR | Patients allowed to return to full activity after 24 weeks. Ongoing use of the ACL brace during sports was recommended postoperatively through at least the first year | 13/13 (100%) RTS |
| 2 | Turati et al.64 | NR | LSI= 99.9% +/- 9.5 with SLH |  | 13/14 (92.9%) RTS |
| 2 | Vermeijden et al.65 | 90% bilateral equivalence with isokinetic testing | NR | Return to pivoting sports allowed 6-12 months postoperatively when range of motion and muscle strength were sufficient | NR |
| 3 | Ekas et al.26 | 60°/s knee extensor/flexor peak torque and LSI (Quad= 84%, Hamstring= 98%) | SLH (LSI=95%), triple hop (LSI=93%), triple-crossover hop (LSI=94%), 6m timed hop (LSI=92%). | NR | 25/44 (57%) RTS. 40/44 (91%) remained active |
| 3 | Filbay et al.30 | NR | NR | RTS was not recommended until 9-12 months post-injury and was dependent on patient and clinical factors including RTS desire, completing rehabilitation, and passing function RTS criteria | **37/40 (92%) ACLOAS grade 1 and 25/40 (62%) ACLOAS grade 2–3 RTS** |
| 3 | Madelaine et al.47 | NR | NR | NR | 53/53 (100%) returned to unrestricted practice including pivoting sports |
| 3 | Moksnes et al.51 | Q and HS peak torque was normalized to BW; Q LSI 90-94%, hamstring LSI 92-95% | SLH, triple hop, triple crossover hop, 6-m timed hop testing (all without brace). LSI consistently >90% | NR | 13/20 (65%) returned to pre-injury activity level |
